# Supplementary material for: An integrative, multi-omics approach towards the prioritization of Klebsiella pneumoniae drug targets
Source: PubMed Central journal article supplement (PMC6050338; doi:10.1038/s41598-018-28916-7), 2018-07-17

## Supplementary Information file

### **An integrative, multi-omics approach towards the prioritization of *Klebsiella pneumoniae* drug targets**

Pablo Ivan Pereira Ramos<sup>1,2#</sup>, Darío Fernández Do Porto<sup>3,4#</sup>, Esteban Lanzarotti<sup>5</sup>, Ezequiel J. Sosa<sup>3</sup>, Germán Burguener<sup>3</sup>, Agustín M. Pardo<sup>5</sup>, Cecilia C. Klein<sup>6,7,☉</sup>, Marie-France Sagot<sup>6,7</sup>, Ana Tereza R. de Vasconcelos<sup>2</sup>, Ana Cristina Gales<sup>8</sup>, Marcelo Marti<sup>3,4,5</sup>, Adrián G. Turjanski<sup>3,4,5\*</sup> & Marisa F. Nicolás<sup>2\*</sup>

#### *Affiliations:*

<sup>1</sup> Instituto Gonçalo Moniz, Fundação Oswaldo Cruz (FIOCRUZ), Salvador, Bahia, Brazil;

<sup>2</sup> Laboratório Nacional de Computação Científica, Petrópolis, Rio de Janeiro, Brazil;

<sup>3</sup> Plataforma de Bioinformática Argentina (BIA), Instituto de Cálculo, Facultad de Ciencias Exactas y Naturales, Universidad de Buenos Aires, Buenos Aires, Argentina;

<sup>4</sup> Departamento de Química Biológica, Facultad de Ciencias Exactas y Naturales, Universidad de Buenos Aires, Ciudad Universitaria, Pabellón 2, C1428EHA Ciudad de Buenos Aires, Argentina

<sup>5</sup> Instituto de Química Biológica de la Facultad de Ciencias Exactas y Naturales (IQUIBICEN) CONICET, Ciudad Universitaria, Pabellón 2, C1428EHA Ciudad de Buenos Aires, Argentina;

<sup>6</sup> Inria Grenoble Rhône-Alpes, Grenoble, France;

<sup>7</sup> Université Claude Bernard Lyon 1, Lyon, France;

☉ Current address: Centre for Genomic Regulation (CRG), Barcelona, Spain;

<sup>8</sup> Laboratório Alerta. Division of Infectious Diseases, Department of Internal Medicine. Escola Paulista de Medicina/Universidade Federal de São Paulo, São Paulo, Brazil.

# Equal contributors.

\* Corresponding authors: MFN ([marisa@lnc.br](mailto:marisa@lnc.br)), AGT ([adrian@qb.fcen.uba.ar](mailto:adrian@qb.fcen.uba.ar))

## Supplementary Table S1

**Title:** Complete list of 226 genomes from the Human Microbiome Project used during our analyses. Corresponding GenBank/NCBI accession numbers are shown.

| Organism                                                 | NCBI Assembly Accession Number |
|----------------------------------------------------------|--------------------------------|
| <i>Erysipelatoclostridium ramosum</i> DSM 1402           | GCF_000154485.1                |
| <i>Lactobacillus ruminis</i> ATCC 25644                  | GCF_000225845.1                |
| <i>Clostridium</i> ] <i>methylpentosum</i> DSM 5476      | GCF_000158655.1                |
| <i>Staphylococcus</i> sp. HGB0015                        | GCF_000411275.1                |
| <i>Eggerthella lenta</i> 1_1_60AFAA                      | GCF_000763035.1                |
| <i>Coprococcus eutactus</i> ATCC 27759                   | GCF_000154425.1                |
| <i>Streptomyces</i> sp. HGB0020                          | GCF_000411315.1                |
| <i>Parabacteroides goldsteinii</i> DSM 19448 = WAL 12034 | GCF_000969835.1                |
| <i>Corynebacterium</i> sp. HFH0082                       | GCF_000411235.1                |
| <i>Eubacterium</i> sp. 3_1_31                            | GCF_000273585.1                |
| <i>Clostridium perfringens</i> WAL-14572                 | GCF_000243175.1                |
| <i>Proteus penneri</i> ATCC 35198                        | GCF_000155835.1                |
| <i>Prevotella salivae</i> DSM 15606                      | GCF_000185845.1                |
| <i>Blautia obeum</i> ATCC 29174                          | GCF_000153905.1                |
| <i>Ruminococcus</i> sp. 5_1_39BFAA                       | GCF_000159975.1                |

|                                                           |                 |
|-----------------------------------------------------------|-----------------|
| <i>Erysipelotrichaceae bacterium 2_2_44A</i>              | GCF_000225685.1 |
| <i>Ruminococcus gnavus ATCC 29149</i>                     | GCF_000169475.1 |
| <i>Anaerostipes caccae DSM 14662</i>                      | GCF_000154305.1 |
| <i>Parvimonas micra ATCC 33270</i>                        | GCF_000154405.1 |
| <i>Alistipes putredinis DSM 17216</i>                     | GCF_000154465.1 |
| <i>Bacteroides cellulosilyticus DSM 14838</i>             | GCF_000158035.1 |
| <i>Edwardsiella tarda ATCC 23685</i>                      | GCF_000163955.1 |
| <i>Helicobacter pullorum MIT 98-5489</i>                  | GCF_000155495.1 |
| <i>Bacteroides] pectinophilus ATCC 43243</i>              | GCF_000155855.1 |
| <i>Bacteroides caccae ATCC 43185</i>                      | GCF_000169015.1 |
| <i>Helicobacter bilis ATCC 43879</i>                      | GCF_000158435.1 |
| <i>Faecalibacterium prausnitzii M21/2</i>                 | GCF_000154385.1 |
| <i>Lactobacillus brevis subsp. gravesensis ATCC 27305</i> | GCF_000159175.1 |
| <i>Lactobacillus rhamnosus LMS2-1</i>                     | GCF_000160175.1 |
| <i>Bacteroides fluxus YIT 12057</i>                       | GCF_000195635.1 |
| <i>Bifidobacterium dentium ATCC 27678</i>                 | GCF_000172135.1 |
| <i>Enterobacteriaceae bacterium 9_2_54FAA</i>             | GCF_000185685.2 |
| <i>Dialister succinatiphilus YIT 11850</i>                | GCF_000242435.1 |
| <i>Veillonella sp. 6_1_27</i>                             | GCF_000163735.1 |

|                                                                    |                 |
|--------------------------------------------------------------------|-----------------|
| <i>Bacillus smithii</i> 7_3_47FAA                                  | GCF_000238675.1 |
| <i>Campylobacter coli</i> JV20                                     | GCF_000146835.1 |
| <i>Bilophila wadsworthia</i> 3_1_6                                 | GCF_000185705.2 |
| <i>Parabacteroides johnsonii</i> DSM 18315                         | GCF_000156495.1 |
| <i>Helicobacter canadensis</i> MIT 98-5491                         | GCF_000162575.1 |
| <i>Desulfovibrio piger</i> ATCC 29098                              | GCF_000156375.1 |
| <i>Dysgonomonas gadei</i> ATCC BAA-286                             | GCF_000213555.1 |
| <i>Anaerobaculum hydrogeniformans</i> ATCC BAA-1850                | GCF_000160455.2 |
| <i>Anaerostipes hadrus</i> DSM 3319                                | GCF_000332875.2 |
| <i>Escherichia coli</i> MS 85-1                                    | GCF_000179075.1 |
| <i>Leuconostoc mesenteroides</i> subsp. <i>cremoris</i> ATCC 19254 | GCF_000160595.1 |
| <i>Phascolarctobacterium succinatutens</i> YIT 12067               | GCF_000188175.1 |
| <i>Clostridium] bolteae</i> ATCC BAA-613                           | GCF_000154365.1 |
| <i>Turicibacter</i> sp. HGF1                                       | GCF_000191865.1 |
| <i>Collinsella intestinalis</i> DSM 13280                          | GCF_000156175.1 |
| <i>Bacteroides xylanisolvens</i> SD CC 1b                          | GCF_000178215.1 |
| <i>Bacteroides intestinalis</i> DSM 17393                          | GCF_000172175.1 |
| <i>Catenibacterium mitsuokai</i> DSM 15897                         | GCF_000173795.1 |
| <i>Dorea</i> sp. D27                                               | GCF_001185345.1 |

|                                                       |                 |
|-------------------------------------------------------|-----------------|
| <i>Parabacteroides</i> sp. HGS0025                    | GCF_000969845.1 |
| <i>Bifidobacterium breve</i> DSM 20213 = JCM 1192     | GCF_001311295.1 |
| <i>Streptococcus anginosus</i> 1_2_62CV               | GCF_000186545.1 |
| <i>Clostridium</i> ] <i>spiroforme</i> DSM 1552       | GCF_000154805.1 |
| <i>Helicobacter cinaedi</i> CCUG 18818 = ATCC BAA-847 | GCF_000349975.1 |
| <i>Subdoligranulum</i> sp. 4_3_54A2FAA                | GCF_000238635.1 |
| <i>Citrobacter youngae</i> ATCC 29220                 | GCF_000155975.1 |
| <i>Campylobacter</i> sp. 10_1_50                      | GCF_000238755.1 |
| <i>Bifidobacterium</i> sp. 12_1_47BFAA                | GCF_000185665.1 |
| <i>Sutterella parvirubra</i> YIT 11816                | GCF_000250875.1 |
| <i>Bacteroides stercoris</i> ATCC 43183               | GCF_000154525.1 |
| <i>Ruminococcus callidus</i> ATCC 27760               | GCF_000468015.1 |
| <i>Desulfovibrio</i> sp. 6_1_46FAA                    | GCF_000224635.1 |
| <i>Eubacterium</i> ] <i>siraeum</i> DSM 15702         | GCF_000382085.1 |
| <i>Holdemanella bififormis</i> DSM 3989               | GCF_000156655.1 |
| <i>Providencia alcalifaciens</i> F90-2004             | GCF_000517805.1 |
| <i>Ralstonia</i> sp. 5_2_56FAA                        | GCF_000227255.2 |
| <i>Bacteroides fragilis</i> 3_1_12                    | GCF_000157015.1 |
| <i>Dermabacter</i> sp. HFH0086                        | GCF_000413375.1 |

|                                                           |                 |
|-----------------------------------------------------------|-----------------|
| <i>Eubacterium] hallii DSM 3353</i>                       | GCF_000173975.1 |
| <i>Enterococcus saccharolyticus 30_1</i>                  | GCF_000234175.1 |
| <i>Paenibacillus sp. HGF5</i>                             | GCF_000204455.1 |
| <i>Blautia hansenii DSM 20583</i>                         | GCF_002222595.1 |
| <i>Helicobacter macacae MIT 99-5501</i>                   | GCF_000507845.1 |
| <i>Campylobacter upsaliensis JV21</i>                     | GCF_000185345.1 |
| <i>Synergistes sp. 3_1_syn1</i>                           | GCF_000238615.1 |
| <i>Coprococcus comes ATCC 27758</i>                       | GCF_000155875.1 |
| <i>Bacteroides clarus YIT 12056</i>                       | GCF_900129655.1 |
| <i>Clostridium] symbiosum ATCC 14940</i>                  | GCF_000466485.1 |
| <i>Collinsella aerofaciens ATCC 25986</i>                 | GCF_000169035.1 |
| <i>Lactobacillus amylolyticus DSM 11664</i>               | GCF_001435665.1 |
| <i>Dorea formicigenerans 4_6_53AFAA</i>                   | GCF_000225745.1 |
| <i>Bacteroides plebeius DSM 17135</i>                     | GCF_000187895.1 |
| <i>Eubacterium ventriosum ATCC 27560</i>                  | GCF_000153885.1 |
| <i>Fusobacterium nucleatum subsp. animalis ATCC 51191</i> | GCF_000220825.1 |
| <i>Providencia rettgeri DSM 1131</i>                      | GCF_000158055.1 |
| <i>Prevotella oralis HGA0225</i>                          | GCF_000413355.1 |
| <i>Lactobacillus ultunensis DSM 16047</i>                 | GCF_001436305.1 |

|                                                                     |                 |
|---------------------------------------------------------------------|-----------------|
| <i>Prevotella copri</i> DSM 18205                                   | GCF_000157935.1 |
| <i>Fusobacterium necrophorum</i> subsp. <i>funduliforme</i> 1_1_36S | GCF_000242215.1 |
| <i>Clostridium</i> ] <i>hylemonae</i> DSM 15053                     | GCF_000156515.1 |
| <i>Bacteroides coprophilus</i> DSM 18228 = JCM 13818                | GCF_001315785.1 |
| <i>Methanobrevibacter smithii</i> DSM 2375                          | GCF_000151245.1 |
| <i>Clostridium</i> ] <i>leptum</i> DSM 753                          | GCF_000154345.1 |
| <i>Anaerofustis stercorihominis</i> DSM 17244                       | GCF_000154825.1 |
| <i>Dysgonomonas mossii</i> DSM 22836                                | GCF_000376405.1 |
| <i>Providencia rustigianii</i> DSM 4541                             | GCF_000156395.1 |
| <i>Lactobacillus hilgardii</i> DSM 20176 = ATCC 8290                | GCF_001434655.1 |
| <i>Tannerella</i> sp. 6_1_58FAA_CT1                                 | GCF_000238695.1 |
| <i>Helicobacter winghamensis</i> ATCC BAA-430                       | GCF_000158455.1 |
| <i>Collinsella tanakaei</i> YIT 12063                               | GCF_000225705.1 |
| <i>Subdoligranulum variabile</i> DSM 15176                          | GCF_000157955.1 |
| <i>Odoribacter laneus</i> YIT 12061                                 | GCF_000243215.1 |
| <i>Collinsella stercoris</i> DSM 13279                              | GCF_000156215.1 |
| <i>Streptococcus equinus</i> ATCC 9812                              | GCF_000187265.1 |
| <i>Clostridium citroniae</i> WAL-17108                              | GCF_000233455.1 |
| <i>Clostridium clostridioforme</i> 2_1_49FAA                        | GCF_000234155.1 |

|                                                                                             |                 |
|---------------------------------------------------------------------------------------------|-----------------|
| <i>Pseudomonas</i> sp. 2_1_26                                                               | GCF_000233495.1 |
| <i>Proteus mirabilis</i> WGLW6                                                              | GCF_000297815.1 |
| <i>Flavonifractor plautii</i> ATCC 29863                                                    | GCF_000239295.1 |
| <i>Bifidobacterium adolescentis</i> L2-32                                                   | GCF_000154085.1 |
| <i>Propionibacterium</i> sp. HGH0353                                                        | GCF_000413335.1 |
| <i>Clostridium</i> ] <i>scindens</i> ATCC 35704                                             | GCF_000154505.1 |
| <i>Enterococcus faecalis</i> 918                                                            | GCF_000690925.1 |
| <i>Paraprevotella clara</i> YIT 11840                                                       | GCF_000233955.1 |
| <i>Lactobacillus plantarum</i> subsp. <i>plantarum</i> ATCC 14917 = JCM 1149 = CGMCC 1.2437 | GCF_001434175.1 |
| <i>Paraprevotella xylaniphila</i> YIT 11841                                                 | GCF_000205165.1 |
| <i>Listeria grayi</i> DSM 20601                                                             | GCF_000148995.1 |
| <i>Anaerotruncus colihominis</i> DSM 17241                                                  | GCF_000154565.1 |
| <i>Eggerthella</i> sp. HGA1                                                                 | GCF_000191845.1 |
| <i>Bacillus</i> sp. 7_6_55CFAA_CT2                                                          | GCF_000238655.1 |
| <i>Eubacterium</i> ] <i>cylindroides</i> ATCC 27803                                         | GCF_000469305.1 |
| <i>Coprococcus</i> sp. HPP0074                                                              | GCF_000411335.1 |
| <i>Slackia piriformis</i> YIT 12062                                                         | GCF_000296445.1 |
| <i>Bifidobacterium gallicum</i> DSM 20093 = LMG 11596                                       | GCF_000771165.1 |
| <i>Bifidobacterium pseudocatenulatum</i> DSM 20438 = JCM 1200 = LMG 10505                   | GCF_001025215.1 |



|                                                                         |                 |
|-------------------------------------------------------------------------|-----------------|
| <i>Lactobacillus helveticus</i> DSM 20075 = CGMCC 1.1877                | GCF_001434945.1 |
| <i>Streptococcus infantarius</i> subsp. <i>infantarius</i> ATCC BAA-102 | GCF_000154985.1 |
| <i>Collinsella</i> sp. 4_8_47FAA                                        | GCF_000763055.1 |
| <i>Alistipes indistinctus</i> YIT 12060                                 | GCF_000231275.1 |
| <i>Bacteroides uniformis</i> ATCC 8492                                  | GCF_000154205.1 |
| <i>Clostridium orbiscindens</i> 1_3_50AFAA                              | GCF_000760655.1 |
| <i>Intestinibacter bartlettii</i> DSM 16795                             | GCF_900167285.1 |
| <i>Butyricoccus pullicaecorum</i> 1.2                                   | GCF_000398925.1 |
| <i>Barnesiella intestinihominis</i> YIT 11860                           | GCF_000296465.1 |
| <i>Oscillibacter</i> sp. KLE 1745                                       | GCF_000469445.2 |
| <i>Acinetobacter junii</i> SH205                                        | GCF_000162075.1 |
| <i>Listeria innocua</i> ATCC 33091                                      | GCF_000241405.1 |
| <i>Clostridium asparagiforme</i> ] DSM 15981                            | GCF_000158075.1 |
| <i>Bilophila</i> sp. 4_1_30                                             | GCF_000224655.1 |
| <i>Corynebacterium ammoniagenes</i> DSM 20306                           | GCF_001941425.1 |
| <i>Enterobacter cancerogenus</i> ATCC 35316                             | GCF_000155995.1 |
| <i>Lachnospiraceae</i> bacterium 3_1_57FAA_CT1                          | GCF_000218405.2 |
| <i>Bacteroides coprocola</i> DSM 17136                                  | GCF_000154845.1 |
| <i>Eubacterium ramulus</i> ATCC 29099                                   | GCF_000469345.1 |

|                                                                  |                 |
|------------------------------------------------------------------|-----------------|
| <i>Coprobacillus</i> sp. 3_3_56FAA                               | GCF_000239735.1 |
| <i>Bacteroides</i> sp. 2_2_4                                     | GCF_000157055.1 |
| <i>Pediococcus acidilactici</i> 7_4                              | GCF_000163095.1 |
| <i>Dorea longicatena</i> DSM 13814                               | GCF_000154065.1 |
| <i>Aneurinibacillus aneurinilyticus</i> ATCC 12856               | GCF_000466385.1 |
| <i>Cetobacterium somerae</i> ATCC BAA-474                        | GCF_000479045.1 |
| <i>Butyrivibrio crossotus</i> DSM 2876                           | GCF_000156015.1 |
| <i>Oxalobacter formigenes</i> HOxBLS                             | GCF_000158475.1 |
| <i>Lactobacillus buchneri</i> ATCC 11577                         | GCF_000159195.1 |
| <i>Pseudoflavonifractor capillosus</i> ATCC 29799                | GCF_000169255.2 |
| <i>Bacteroides eggerthii</i> 1_2_48FAA                           | GCF_000273465.1 |
| <i>Blautia hydrogenotrophica</i> DSM 10507                       | GCF_000157975.1 |
| <i>Fusobacterium varium</i> ATCC 27725                           | GCF_000159915.2 |
| <i>Lactobacillus fermentum</i> ATCC 14931                        | GCF_000159215.1 |
| <i>Roseburia intestinalis</i> L1-82                              | GCF_000156535.1 |
| <i>Streptococcus</i> sp. 2_1_36FAA                               | GCF_000161955.1 |
| <i>Clostridium celatum</i> DSM 1785                              | GCF_000320405.1 |
| <i>Ruminococcaceae</i> bacterium D16                             | GCF_000177015.2 |
| <i>Bifidobacterium bifidum</i> ATCC 29521 = JCM 1255 = DSM 20456 | GCF_001025135.1 |

|                                                                     |                 |
|---------------------------------------------------------------------|-----------------|
| <i>Peptoclostridium difficile</i> NAP08                             | GCF_000164175.1 |
| <i>Mitsuokella multacida</i> DSM 20544                              | GCF_000155955.1 |
| <i>Ruminococcus lactaris</i> ATCC 29176                             | GCF_000155205.1 |
| <i>Ruminococcus torques</i> ATCC 27756                              | GCF_000153925.1 |
| <i>Clostridium sporogenes</i> ATCC 15579                            | GCF_000155085.1 |
| <i>Succinatimonas hippei</i> YIT 12066                              | GCF_000188195.1 |
| <i>Holdemania filiformis</i> DSM 12042                              | GCF_000157995.1 |
| <i>Bacteroides oleiciplenus</i> YIT 12058                           | GCF_000315485.1 |
| <i>Lactobacillus delbrueckii</i> subsp. <i>lactis</i> DSM 20072     | GCA_002017855.1 |
| <i>Yokenella regensburgei</i> ATCC 43003                            | GCF_000239335.1 |
| <i>Bifidobacterium angulatum</i> DSM 20098 = JCM 7096               | GCF_001025155.1 |
| <i>Tyzzerella nexilis</i> DSM 1787                                  | GCF_000156035.2 |
| <i>Porphyromonas</i> sp. 31_2                                       | GCA_000712235.1 |
| <i>Roseburia inulinivorans</i> DSM 16841                            | GCF_000174195.1 |
| <i>Bifidobacterium catenulatum</i> DSM 16992 = JCM 1194 = LMG 11043 | GCF_001025195.1 |
| <i>Escherichia</i> sp. 3_2_53FAA                                    | GCF_000157115.2 |
| <i>Parasutterella excrementihominis</i> YIT 11859                   | GCF_000205025.1 |
| <i>Arcobacter butzleri</i> JV22                                     | GCF_000185325.1 |
| <i>Helicobacter pylori</i> GAM115Ai                                 | GCF_000345045.1 |

|                                                                   |                 |
|-------------------------------------------------------------------|-----------------|
| <i>Bacteroides salyersiae</i> WAL 10018 = DSM 18765 = JCM 12988   | GCF_000381365.1 |
| <i>Clostridiales bacterium</i> 1_7_47FAA                          | GCF_000155435.1 |
| <i>Clostridium</i> sp. KLE 1755                                   | GCF_000466465.2 |
| <i>Bacteroides dorei</i> DSM 17855                                | GCF_000156075.1 |
| <i>Cedecea davisae</i> DSM 4568                                   | GCF_000412335.1 |
| <i>Clostridium</i> ] <i>hiranonis</i> DSM 13275                   | GCF_000156055.1 |
| <i>Hafnia alvei</i> ATCC 51873                                    | GCF_000239255.1 |
| <i>Weissella paramesenteroides</i> ATCC 33313                     | GCF_000160575.1 |
| <i>Prevotella stercorea</i> DSM 18206                             | GCF_000235885.1 |
| <i>Eubacterium</i> ] <i>dolichum</i> DSM 3991                     | GCF_000154285.1 |
| <i>Acidaminococcus</i> sp. D21                                    | GCF_000174215.1 |
| <i>Coprobacillus</i> sp. D7                                       | GCF_000158555.1 |
| <i>Anaerococcus hydrogenalis</i> DSM 7454                         | GCF_000173355.1 |
| <i>Lactobacillus paracasei</i> subsp. <i>paracasei</i> ATCC 25302 | GCF_000159495.1 |
| <i>Clostridium</i> ] <i>hathewayi</i> DSM 13479                   | GCF_000160095.1 |
| <i>Citrobacter</i> sp. 30_2                                       | GCA_002215605.1 |
| <i>Megamonas funiformis</i> YIT 11815                             | GCF_000245775.1 |
| <i>Paenisporosarcina</i> sp. HGH0030                              | GCF_000411295.1 |
| <i>Blautia</i> sp. KLE 1732                                       | GCF_000466565.1 |

|                                                         |                 |
|---------------------------------------------------------|-----------------|
| <i>Bacteroides vulgatus</i> PC510                       | GCF_000178195.1 |
| <i>Fusobacterium mortiferum</i> ATCC 9817               | GCF_000158195.2 |
| <i>Marvinbryantia formatexigens</i> DSM 14469           | GCF_000173815.1 |
| <i>Fusobacterium ulcerans</i> ATCC 49185                | GCF_000158315.2 |
| <i>Neisseria macacae</i> ATCC 33926                     | GCF_000220865.1 |
| <i>Lactobacillus antri</i> DSM 16041                    | GCF_001435475.1 |
| <i>Lactobacillus</i> sp. 7_1_47FAA                      | GCF_000227195.1 |
| <i>Helicobacter canis</i> NCTC 12740                    | GCF_000507865.1 |
| <i>Lactobacillus acidophilus</i> ATCC 4796              | GCF_000159715.1 |
| <i>Parabacteroides merdae</i> ATCC 43184                | GCF_000154105.1 |
| <i>Desulfitobacterium hafniense</i> DP7                 | GCF_000238035.1 |
| <i>Acinetobacter radioresistens</i> SH164               | GCF_000162115.1 |
| <i>Burkholderiales bacterium</i> 1_1_47                 | GCF_000144975.1 |
| <i>Citrobacter freundii</i> 4_7_47CFAA                  | GCF_000238735.1 |
| <i>Bacteroides ovatus</i> 3_8_47FAA                     | GCF_000218325.1 |
| <i>Bifidobacterium longum</i> subsp. <i>longum</i> 2-2B | GCF_000261205.1 |
| <i>Fusobacterium gonidiaformans</i> ATCC 25563          | GCF_000158835.2 |
| <i>Bacteroides finegoldii</i> DSM 17565                 | GCF_000156195.1 |
| <i>Sutterella wadsworthensis</i> 3_1_45B                | GCF_000186505.1 |

|                                        |                 |
|----------------------------------------|-----------------|
| <i>Actinomyces</i> sp. HPA0247         | GCF_000411415.1 |
| <i>Providencia stuartii</i> ATCC 25827 | GCF_000154865.1 |

## Supplementary Table S2

**Title:** Genomes of pathogenic *Klebsiella pneumoniae* and corresponding NCBI/GenBank accession numbers used in conservation analysis.

| Organism                                              | Strain        | NCBI Assembly Accession Number |
|-------------------------------------------------------|---------------|--------------------------------|
| <i>Klebsiella pneumoniae</i> subsp. <i>pneumoniae</i> | HS11286       | GCA_000240185.2                |
| <i>Klebsiella pneumoniae</i>                          | ATCC BAA-2146 | GCA_000364385.2                |
| <i>Klebsiella pneumoniae</i>                          | JM45          | GCA_000445405.1                |
| <i>Klebsiella pneumoniae</i> subsp. <i>pneumoniae</i> | PittNDM01     | GCA_000733255.1                |
| <i>Klebsiella pneumoniae</i>                          | PMK1          | GCA_000764615.1                |
| <i>Klebsiella pneumoniae</i> subsp. <i>pneumoniae</i> | KPNIH29       | GCA_000784945.1                |
| <i>Klebsiella pneumoniae</i>                          | XH209         | GCA_000775955.1                |
| <i>Klebsiella pneumoniae</i> subsp. <i>pneumoniae</i> | NTUH-K2044    | GCA_000009885.1                |
| <i>Klebsiella pneumoniae</i> subsp. <i>pneumoniae</i> | 1084          | GCA_000294365.1                |
| <i>Klebsiella pneumoniae</i> subsp. <i>pneumoniae</i> | KPNIH10       | GCA_000281435.2                |
| <i>Klebsiella pneumoniae</i> subsp. <i>pneumoniae</i> | KPNIH1        | GCA_000281535.2                |

|                                                |                        |                 |
|------------------------------------------------|------------------------|-----------------|
| <i>Klebsiella pneumoniae</i>                   | 500_1420               | GCA_000406765.2 |
| <i>Klebsiella pneumoniae</i>                   | UHKPC33                | GCA_000417085.2 |
| <i>Klebsiella pneumoniae</i>                   | DMC1097                | GCA_000417225.2 |
| <i>Klebsiella pneumoniae</i>                   | UHKPC07                | GCA_000417265.2 |
| <i>Klebsiella pneumoniae</i>                   | 30684/NJST258_2        | GCA_000597905.1 |
| <i>Klebsiella pneumoniae</i>                   | 30660/NJST258_1        | GCA_000598005.1 |
| <i>Klebsiella pneumoniae subsp. pneumoniae</i> | KPNIH24                | GCA_000714675.1 |
| <i>Klebsiella pneumoniae subsp. pneumoniae</i> | KPR0928                | GCA_000717515.1 |
| <i>Klebsiella pneumoniae subsp. pneumoniae</i> | KPNIH33                | GCA_000775375.1 |
| <i>Klebsiella pneumoniae subsp. pneumoniae</i> | KPNIH32                | GCA_000775395.1 |
| <i>Klebsiella pneumoniae subsp. pneumoniae</i> | KPNIH30                | GCA_000784985.1 |
| <i>Klebsiella pneumoniae</i>                   | CAV1596                | GCA_001022235.1 |
| <i>Klebsiella pneumoniae subsp. pneumoniae</i> | KPNIH27                | GCA_000695935.1 |
| <i>Klebsiella pneumoniae subsp. pneumoniae</i> | ATCC 700721; MGH 78578 | GCA_000016305.1 |
| <i>Klebsiella pneumoniae subsp. pneumoniae</i> | KPNIH31                | GCA_000785005.1 |



|                                                |                  |                 |
|------------------------------------------------|------------------|-----------------|
| <i>Klebsiella pneumoniae</i>                   | blaNDM-1         | GCA_000739495.1 |
| <i>Klebsiella pneumoniae subsp. pneumoniae</i> | Kp13             | GCA_000512165.1 |
| <i>Klebsiella pneumoniae subsp. pneumoniae</i> | ATCC 43816 KPPR1 | GCA_000742755.1 |
| <i>Klebsiella pneumoniae subsp. pneumoniae</i> | 234-12           | GCA_000981845.1 |
| <i>Klebsiella pneumoniae</i>                   | Kp52.145         | GCA_000968155.1 |
| <i>Klebsiella pneumoniae</i>                   | CG43             | GCA_000474015.1 |
| <i>Klebsiella pneumoniae</i>                   | CAV1344          | GCA_001022175.1 |
| <i>Klebsiella pneumoniae</i>                   | CAV1392          | GCA_001022035.1 |
| <i>Klebsiella pneumoniae</i>                   | 32192            | GCA_000807395.3 |
| <i>Klebsiella pneumoniae</i>                   | HK787            | GCA_000813205.1 |
| <i>Klebsiella pneumoniae</i>                   | 34618            | GCA_000814305.1 |
| <i>Klebsiella pneumoniae subsp. pneumoniae</i> | 1158             | GCA_000814805.1 |

## Supplementary Figure S1

**Title:** An overview of the prioritization process.

**Description:** An overview of the total proteome count for *Klebsiella pneumoniae* Kp13 and the subsequent shortlisting steps, which included the obtaining of structural models and identification of druggable features therein. The 2,769 proteins in the golden set were those ranked according to Equations 1, 2 and 3 (main manuscript text).

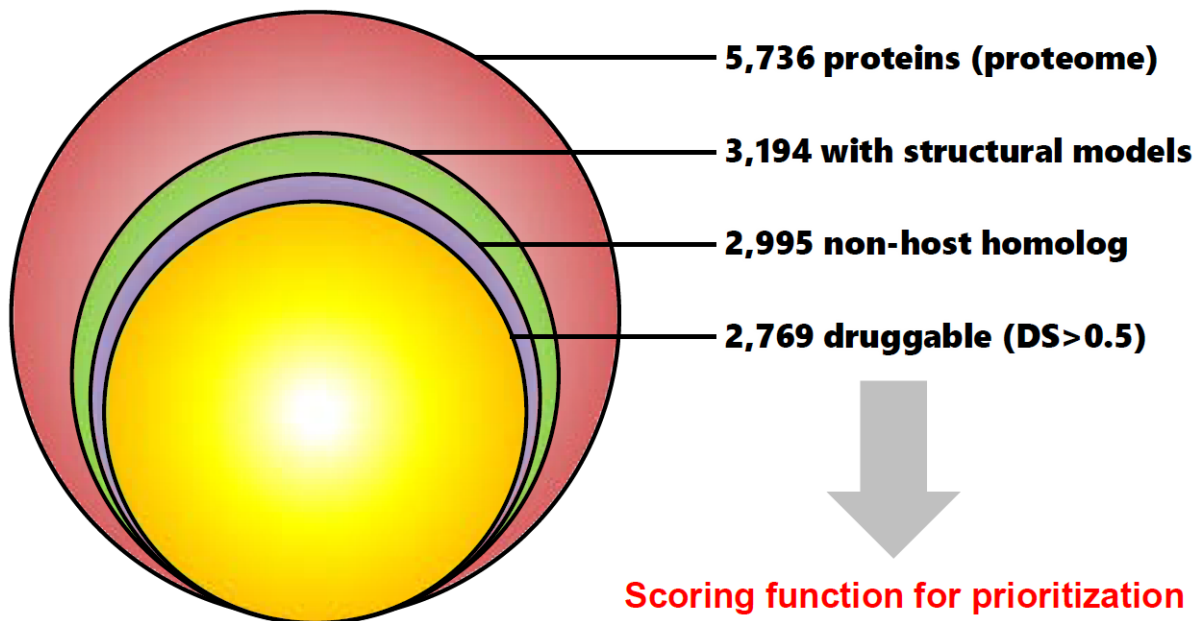

## Supplementary Figure S2

**Title:** Protein conservation of *K. pneumoniae* Kp13 (reference) compared to other pathogenic strains (lines).

**Description:** Each red-colored cell indicate the presence of an ortholog in *K. pneumoniae* Kp13 in the compared strain (see Methods for sequence comparison criteria). No ordering was performed along the X-axis, which follows Kp13 increasing locus ordering. Hierarchical clustering was performed along the Y-axis indicating relationship between the strains based on ortholog presence/absence. The blue bar above the image indicates chromosomally-encoded sequences, while the yellow bar indicates plasmidial-encoded sequences, indicating that conservation of chromosomal sequences is much larger than those encoded by genes in plasmidial genes.

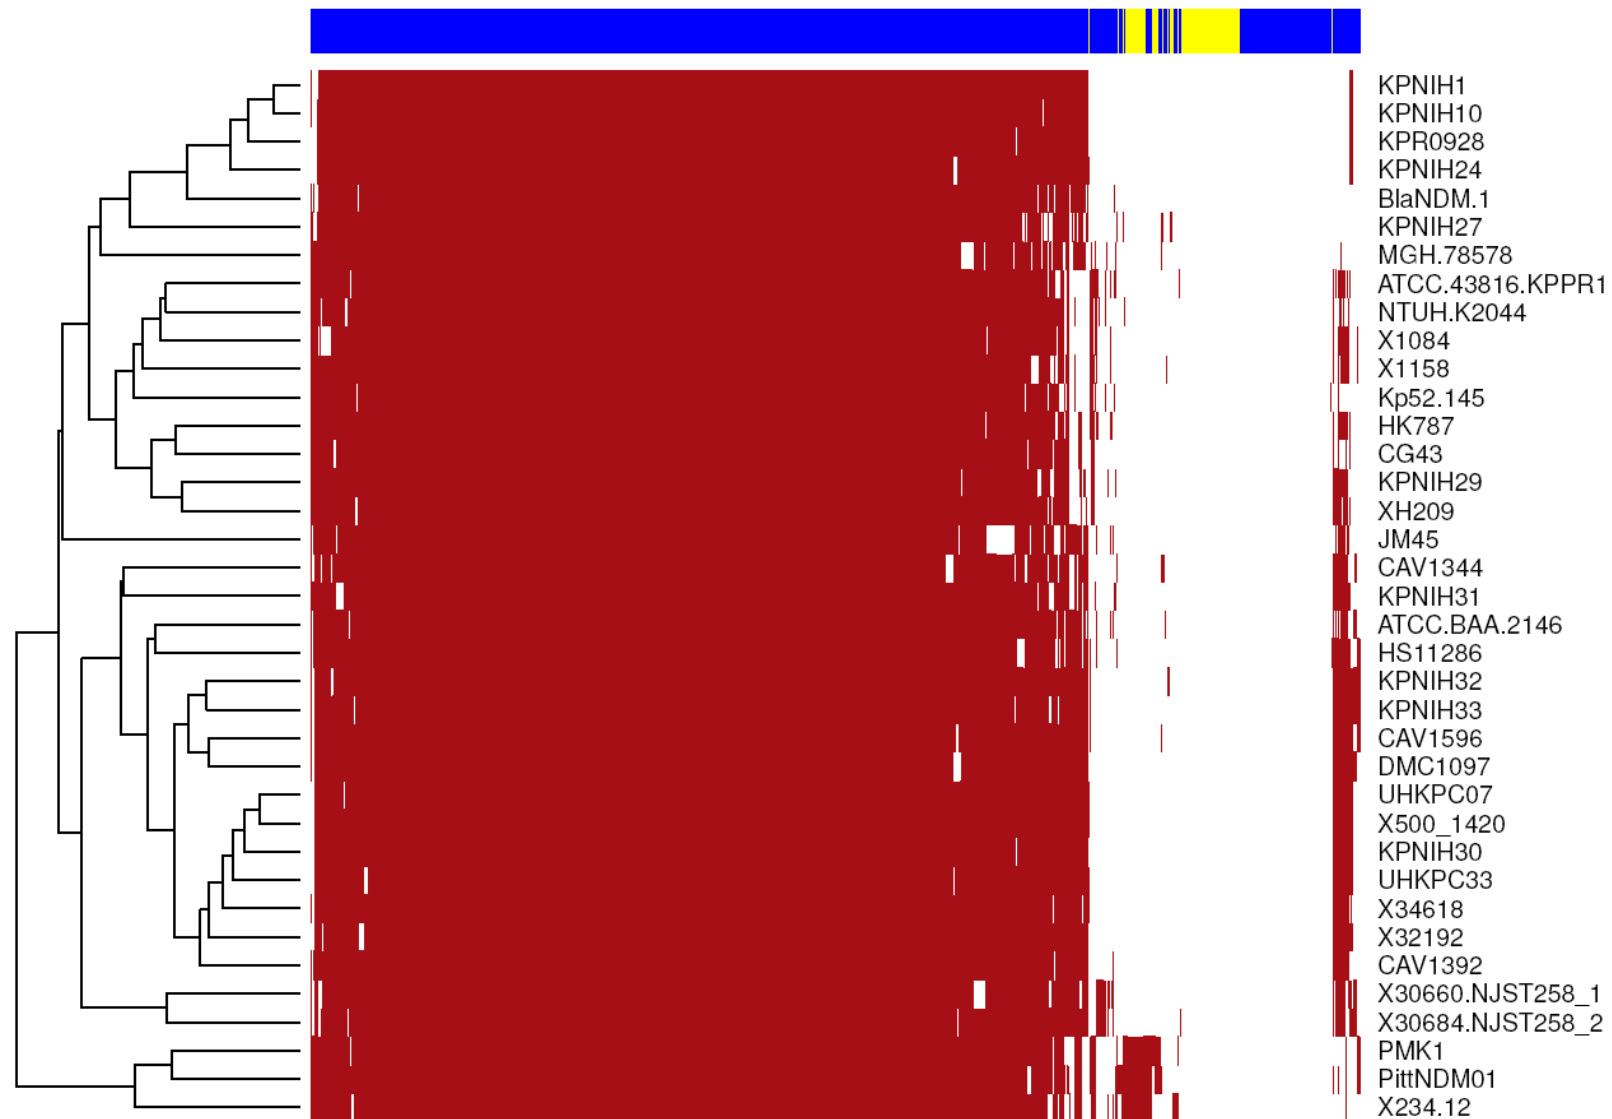

Supplement: 41598_2018_28916_MOESM1_ESM.pdf [file 41598_2018_28916_MOESM1_ESM.pdf]
